# Supplementary material
Source: PubMed Central journal article supplement (PMC4323378)
Supplement: NIHMS622562-supplement-10719_2014_9548_MOESM1_ESM.pdf [file NIHMS622562-supplement-10719_2014_9548_MOESM1_ESM.pdf]

## **SUPPLEMENTAL MATERIAL**

### **Contents:**

Supplemental Tables

Supplemental Figures

Supplemental Table S1: Acceptor list \*

| Enzyme activity measured                                                                                                                                                                                                                                                                                                                                                                                           | Acceptors used                                                                                                                                                                             |
|--------------------------------------------------------------------------------------------------------------------------------------------------------------------------------------------------------------------------------------------------------------------------------------------------------------------------------------------------------------------------------------------------------------------|--------------------------------------------------------------------------------------------------------------------------------------------------------------------------------------------|
| <b>Galactosyltransferase (5mM):</b>                                                                                                                                                                                                                                                                                                                                                                                |                                                                                                                                                                                            |
| $\beta$ 1,3GalT                                                                                                                                                                                                                                                                                                                                                                                                    | GalNAc $\alpha$ -PABA<br>GalNAc $\alpha$ -sp-biotin                                                                                                                                        |
| $\beta$ 1,4GalT                                                                                                                                                                                                                                                                                                                                                                                                    | Gal $\beta$ 1,3(GlcNAc $\beta$ 1,6)GalNAc $\alpha$ -sp-biotin<br>Gal $\beta$ 1,3(GlcNAc $\beta$ 1,6)GalNAc $\alpha$ -O-Bn                                                                  |
| $\beta$ 1,3/4GalT                                                                                                                                                                                                                                                                                                                                                                                                  | GlcNAc $\beta$ 1,6GalNAc $\alpha$ -sp-biotin                                                                                                                                               |
| <b>Sialyltransferase (0.6mM):</b>                                                                                                                                                                                                                                                                                                                                                                                  |                                                                                                                                                                                            |
| ST3/6[Gal $\beta$ 1,3GalNAc]                                                                                                                                                                                                                                                                                                                                                                                       | Gal $\beta$ 1,3GalNAc $\alpha$ -sp-biotin<br>Gal $\beta$ 1,3GalNAc $\alpha$ -PABA                                                                                                          |
| ST3[Gal $\beta$ 1,3GalNAc]                                                                                                                                                                                                                                                                                                                                                                                         | Gal $\beta$ 1,3(GlcNAc $\beta$ 1,6)GalNAc $\alpha$ -O-Bn                                                                                                                                   |
| ST3/6[Gal $\beta$ 1,4GlcNAc]                                                                                                                                                                                                                                                                                                                                                                                       | Gal $\beta$ 1,4GlcNAc $\beta$ -sp-biotin<br>Gal $\beta$ 1,4GlcNAc $\beta$ 1,3Gal $\beta$ 1,4GlcNAc $\beta$ -O-Bn<br>Gal $\beta$ 1,4GlcNAc $\beta$ 1,3Gal $\beta$ - $\Phi$ -NO <sub>2</sub> |
| ST3/6[Gal $\beta$ 1,3GlcNAc]                                                                                                                                                                                                                                                                                                                                                                                       | Gal $\beta$ 1,3GlcNAc $\beta$ 1,3lac $\beta$ - $\Phi$ -NO <sub>2</sub>                                                                                                                     |
| <b>Fucosyltransferase (1.5mM) **: </b>                                                                                                                                                                                                                                                                                                                                                                             |                                                                                                                                                                                            |
| $\alpha$ 1,3FT[Gal $\beta$ 1,4GlcNAc]                                                                                                                                                                                                                                                                                                                                                                              | Gal $\beta$ 1,4GlcNAc $\beta$ 1,3Gal $\beta$ - $\Phi$ -NO <sub>2</sub><br>Gal $\beta$ 1,4GlcNAc $\beta$ 1,3Gal $\beta$ 1,4GlcNAc $\beta$ -O-Bn                                             |
| $\alpha$ 1,4FT[Gal $\beta$ 1,3GlcNAc]                                                                                                                                                                                                                                                                                                                                                                              | Gal $\beta$ 1,3GlcNAc $\beta$ 1,3lac $\beta$ - $\Phi$ -NO <sub>2</sub>                                                                                                                     |
| $\alpha$ 1,3FT[SialylLacNAc]                                                                                                                                                                                                                                                                                                                                                                                       | Neu5Ac $\alpha$ 2,3Gal $\beta$ 1,4GlcNAc $\beta$ -PAA-biotin                                                                                                                               |
| * Table lists enzyme activities measured in the current study along with a list of synthetic acceptors used. Concentration of acceptor in individual assays is indicated. These were greater than reaction K <sub>M</sub> in all cases. When more than one product may form during a reaction, multiple enzyme activities measured or types of potential glycosidic bonds formed are specified in the left column. |                                                                                                                                                                                            |
| ** $\alpha$ 1,2FT activity is low in breast cancer cell lines and thus enzyme activity for LacNAc based acceptors is attributed to either $\alpha$ 1,3FT or $\alpha$ 1,4FT alone.                                                                                                                                                                                                                                  |                                                                                                                                                                                            |

Supplemental Table S2: Enzymes activity in breast cancer cells

|                                       | <b>ZR-75-1</b><br>(metastatic ER+ ductal carcinoma) | <b>MCF7</b><br>(metastatic ER+ ductal adenocarcinoma) | <b>T-47D</b><br>(metastatic ER+ ductal carcinoma) | <b>DU4475</b><br>(non-metastatic triple negative carcinoma) |
|---------------------------------------|-----------------------------------------------------|-------------------------------------------------------|---------------------------------------------------|-------------------------------------------------------------|
| Cell type                             | Luminal                                             | Luminal                                               | Luminal                                           | Basal                                                       |
| $\beta$ 1,3GalT                       | +                                                   | -                                                     | ++                                                | ++                                                          |
| $\beta$ 1,4GalT                       | -                                                   | -                                                     | -                                                 | -                                                           |
| ST3[Gal $\beta$ 1,3GalNAc]            | +++                                                 | +++                                                   | ++                                                | +                                                           |
| ST3/6[Gal $\beta$ 1,4GlcNAc]          | +                                                   | -                                                     | +                                                 | -                                                           |
| $\alpha$ 1,3FT[Gal $\beta$ 1,4GlcNAc] | +                                                   | +                                                     | +                                                 | +                                                           |
| $\alpha$ 1,3FT [SialylLacNAc]         | +                                                   | +                                                     | -                                                 | -                                                           |
| $\alpha$ 1,4FT[Gal $\beta$ 1,3GlcNAc] | ++                                                  | +                                                     | +                                                 | +                                                           |

“-”: Enzyme activity comparable to negative control, “+”: 2-10 times negative control, “++”: 10-30 times negative control, “+++” >30 times negative control.

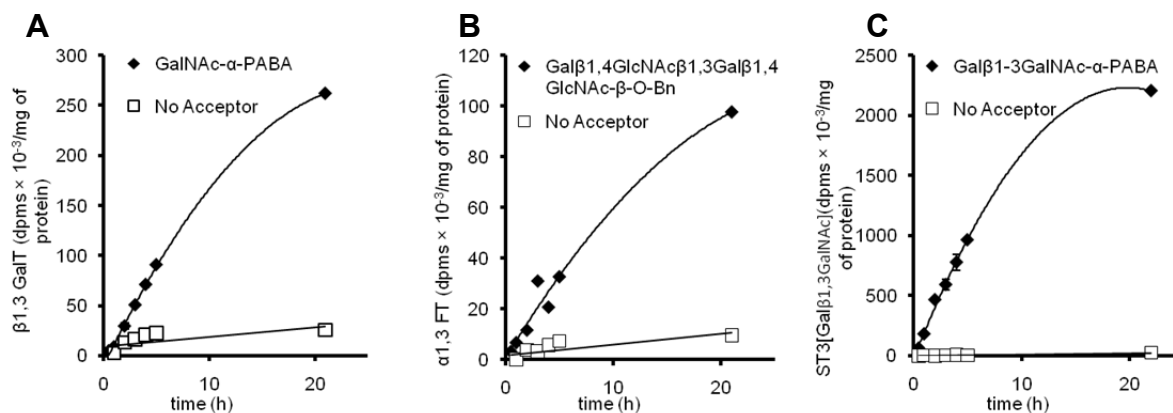

**Figure S1: Time course of glycosyltransferase activity in cancer cell line:** 1mg/mL ZR-75-1 cell lysate was used as catalyst for  $\beta 1,3$ GalT (panel A),  $\alpha 1,3$ FucT (panel B) and  $\alpha 2,3$ SialylT (panel C) assays. Reaction conditions were identical to Fig. 2-3 in the main manuscript. In this case, samples withdrawn at indicated times were analyzed using RP-TLC. As seen, the extent of enzymatic reactions proceeds approximately linearly during the first 6h for all assays.

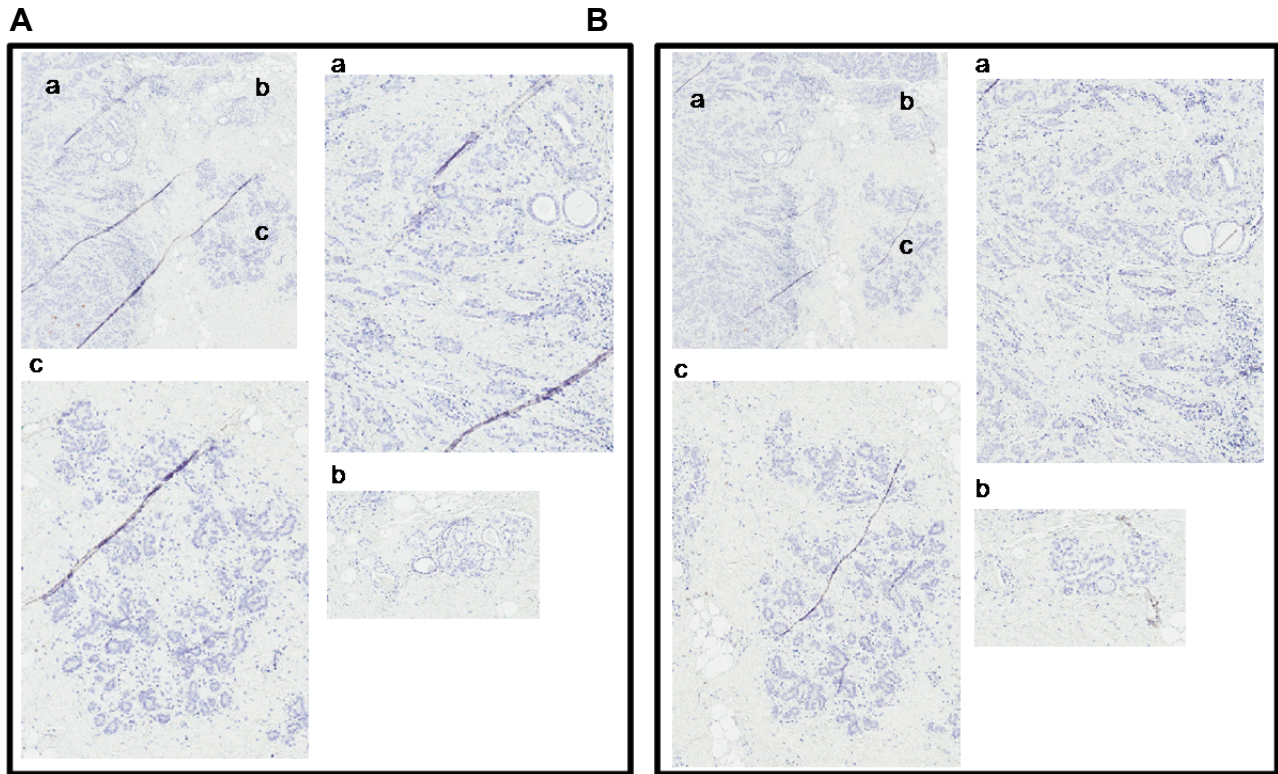

**Figure S2: Histochemistry images without sialidase.** *A.* Staining with anti T-antigen antibody for breast tumor section with adjacent normal. The section is labeled as a. Tumor section b. Ductal region in normal section c. Lobular section in normal section. *B.* Staining with PNA lectin for breast tumor section with adjacent normal. The section is labeled identical to panel *A.*

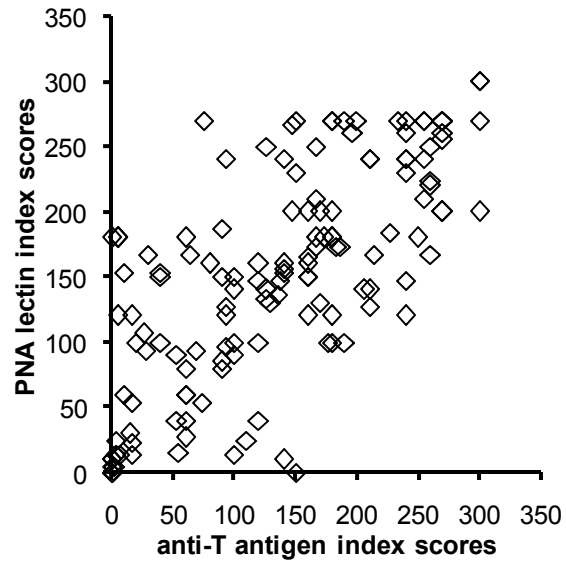

**Figure S3: Correlation between PNA lectin and anti T-antigen mAb staining in breast TMA after neuraminidase treatment: Pearson correlation score = 0.725.**

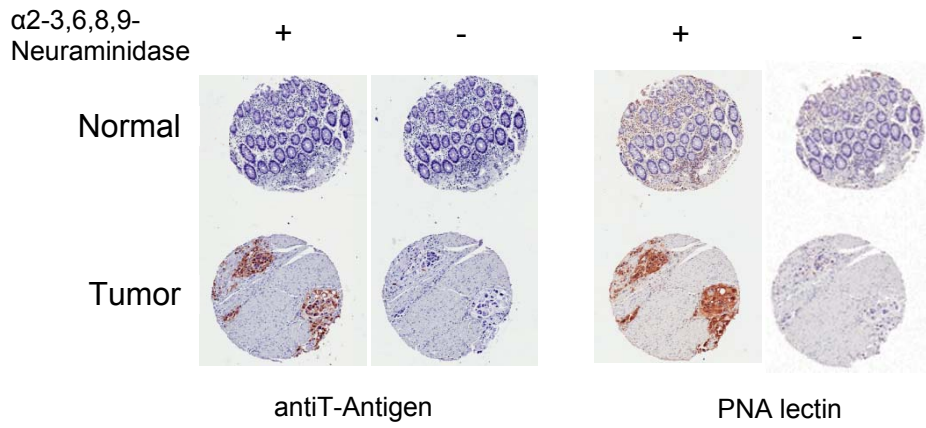

**Figure S4: Specific case of matched colon tumor and normal sample.** Images of matched normal and tumor section of colon cancer patient stained with anti T-antigen and PNA lectin, after treatment with (‘+’) or without (‘-’) neuraminidase.

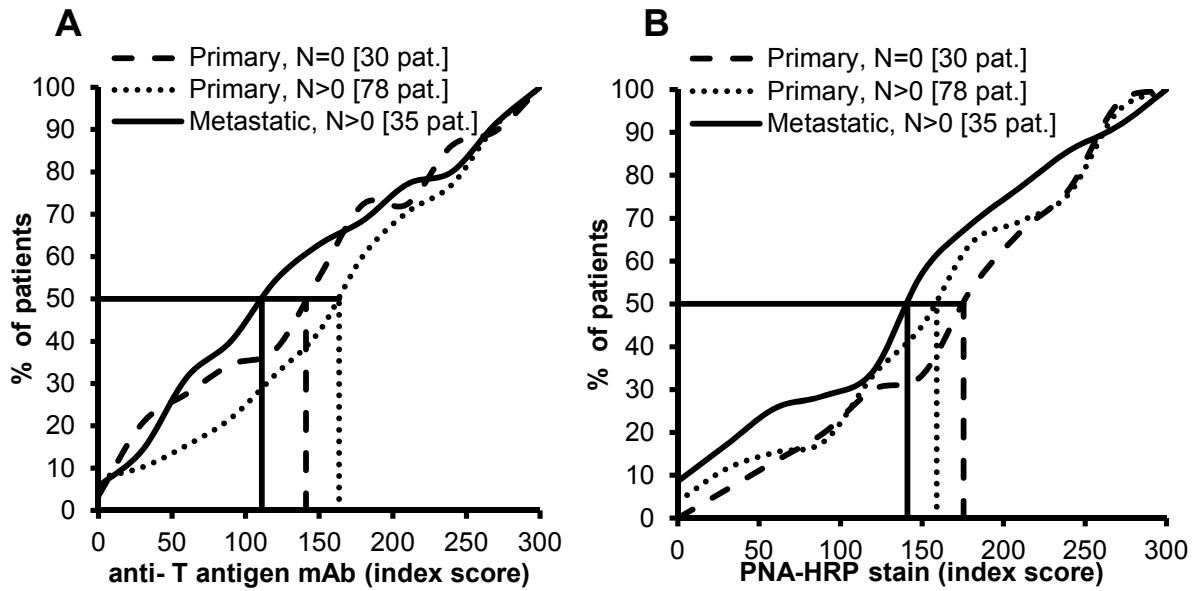

**Figure S5: Correlation of amount of staining with metastatic stage.** *A.* Plot showing variation of distribution of number of patients in the 3 different groups viz. non-metastatic (Primary, N=0), primary metastatic tumor (Primary, N>0), metastasized tumor (Metastatic, N>0) with anti-T antigen staining (panel **A**) and PNA-HRP staining (panel **B**). Number of patients in each category is provided in square brackets. As seen, metastasized tumors have less staining of both anti-T-antigen mAb and PNA-HRP.
